# Supplementary material
Source: HighWire-hosted journal article supplement (https://www.cmaj.ca/highwire/filestream/58315/field_highwire_adjunct_files/0/image-ruan-1-at.pdf)

**Appendix 1: Normal chest radiograph in a 17-year-old boy with hemoptysis.**

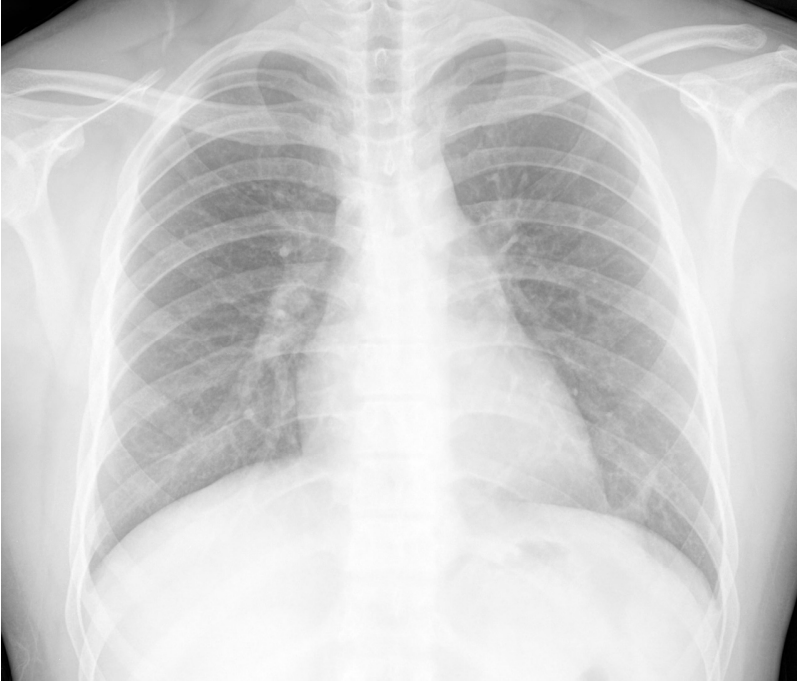

Supplement: image-ruan-1-at.pdf [file image-ruan-1-at.pdf]
